# Supplementary material for: One-pot synthesis of bimodal silica nanospheres and their effects on the rheological and thermal–mechanical properties of silica–epoxy composites
Source: Royal Society of Chemistry journal article supplement (doi:10.1039/c5ra06914a), 2015-01-01
Supplement: c5ra06914a1.pdf [file c5ra06914a1.pdf]

## Electronic Supplementary Information

### **One-pot synthesis of bimodal silica nanospheres and their effects on the rheological and thermal-mechanical properties of silica-epoxy composites**

Qian Guo,<sup>a,b</sup> Pengli Zhu,<sup>\*a</sup> Gang Li,<sup>a</sup> Liang Huang,<sup>a,b</sup> Yu Zhang,<sup>a</sup> Daoqiang Daniel Lu,<sup>\*a</sup>  
Rong Sun,<sup>\*a</sup> and Chingping Wong<sup>c,d</sup>

<sup>a</sup> Shenzhen Institutes of Advanced Technology, Chinese Academy of Sciences, Shenzhen, China. E-mail: pl.zhu@siat.ac.cn

<sup>b</sup> Shenzhen College of Advanced Technology, University of Chinese Academy of Sciences, Shenzhen, China

<sup>c</sup> School of Materials Sciences and Engineering, Georgia Institute of Technology, Atlanta, USA

<sup>d</sup> Department of Electronic Engineering, The Chinese University of Hong Kong, Hong Kong, China

\*E-mail: pl.zhu@siat.ac.cn

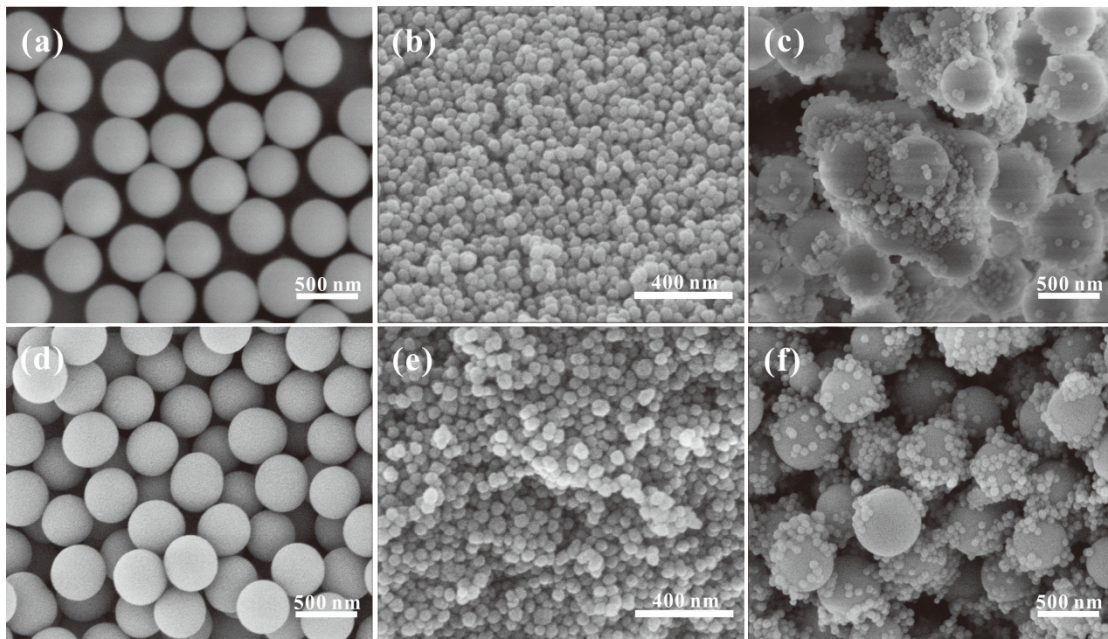

**Fig. S1** SEM images of the morphology of different kinds of fillers before (above) and after (below) calcination at 800 °C: (a, d) L-SMSs, (b, e) S-SNSs, and (c, f) B-SNSs.

There are no obvious differences in morphology between the silica fillers before (Fig. S1 above) and after (Fig. S1 below) calcination at 800 °C, which indicates that the calcination process used in this work could not lead the silica fillers to be sintered.
